# Supplementary material
Source: PubMed Central journal article supplement (PMC9933930)
Supplement: NEJMoa2213082_data-sharing.pdf [file NEJMoa2213082_data-sharing.pdf]

## Data Sharing Statement

Winokur P, Gayed J, Fitz-Patrick D, et al. Bivalent Omicron BA.1–Adapted BNT162b2 Booster in Adults Older than 55 Years. N Engl J Med. DOI: 10.1056/NEJMoa2213082.

| Question                                                            | Authors' Response                                                                                                                                                                                        |
|---------------------------------------------------------------------|----------------------------------------------------------------------------------------------------------------------------------------------------------------------------------------------------------|
| Will the data collected for your study be made available to others? | Yes                                                                                                                                                                                                      |
| Would you like to offer context for your decision?                  | —                                                                                                                                                                                                        |
| Which data?                                                         | —                                                                                                                                                                                                        |
| Additional information about data                                   | Upon request, and subject to review.                                                                                                                                                                     |
| How or where can the data be obtained?                              | Upon request through the following website:<br><a href="https://www.pfizer.com/science/clinical-trials/trial-data-and-results">https://www.pfizer.com/science/clinical-trials/trial-data-and-results</a> |
| When will data availability begin?                                  | Upon request, and subject to review.                                                                                                                                                                     |
| When will data availability end?                                    | —                                                                                                                                                                                                        |
| Will any supporting documents be available?                         | —                                                                                                                                                                                                        |
| Which supporting documents?                                         | —                                                                                                                                                                                                        |
| Additional information about supporting documents                   | —                                                                                                                                                                                                        |
| How or where can supporting documents be obtained?                  | —                                                                                                                                                                                                        |
| When will supporting documents availability begin?                  | —                                                                                                                                                                                                        |
| When will supporting documents availability end?                    | —                                                                                                                                                                                                        |
| To whom will data be available?                                     | —                                                                                                                                                                                                        |
| For what type of analysis or purpose?                               | —                                                                                                                                                                                                        |
| By what mechanism?                                                  | —                                                                                                                                                                                                        |
| Any other restrictions?                                             | —                                                                                                                                                                                                        |
| Additional information                                              | —                                                                                                                                                                                                        |

This statement was posted on January 19, 2023, at NEJM.org.
