# Supplementary material
Source: PubMed Central journal article supplement (PMC9933930)
Supplement: NEJMoa2213082_disclosures.pdf [file NEJMoa2213082_disclosures.pdf]

Discloser Identifier: 1098363

Disclosure Purpose: 22-13082

## Summary of Interests

### Company or Organization

| Entity                                                             | Type                                                                | Interest Held By |
|--------------------------------------------------------------------|---------------------------------------------------------------------|------------------|
| Pfizer Pharmaceuticals LLC                                         | Employment                                                          | Self             |
| <i>Title:</i> Associate Director<br><i>Additional Information:</i> | <i>Position Description:</i> Study Statistician on COVID-19 studies |                  |

## Additional Questions

1. Are there other relationships or activities that readers could perceive to have influenced, or that give the appearance of potentially influencing, what you wrote in the submitted work?

No.

2. What is the manuscript title?

A Bivalent Omicron-BA.1-Adapted BNT162b2 COVID-19 Booster in >55-Year-Olds

3. Are you the corresponding author?

No.

## Certification

I certify that the information provided in this disclosure is complete and accurate.

Sandra Buitrago

**Discloser Identifier:** 1098367

**Disclosure Purpose:** 22-13082

## Summary of Interests

I do not have any interests to disclose at this time.

## Additional Questions

**1. Are there other relationships or activities that readers could perceive to have influenced, or that give the appearance of potentially influencing, what you wrote in the submitted work?**

No.

**2. What is the manuscript title?**

A Bivalent Omicron-BA.1-Adapted BNT162b2 COVID-19 Booster in >55-Year-Olds (22-13082)

**3. Are you the corresponding author?**

No.

## Certification

I certify that the information provided in this disclosure is complete and accurate.

Jose Cardona

**Discloser Identifier:** 978408

**Disclosure Purpose:** 22-13082

## Summary of Interests

I do not have any interests to disclose at this time.

## Additional Questions

**1. Are there other relationships or activities that readers could perceive to have influenced, or that give the appearance of potentially influencing, what you wrote in the submitted work?**

No.

**2. What is the manuscript title?**

A Bivalent Omicron-BA.1-Adapted BNT162b2 COVID-19 Booster in >55-Year-Olds

**3. Are you the corresponding author?**

No.

## Certification

I certify that the information provided in this disclosure is complete and accurate.

David Cooper

Discloser Identifier: 970668

Disclosure Purpose: 22-13082

## Summary of Interests

### Company or Organization

| Entity                                                             | Type         | Interest Held By                                |
|--------------------------------------------------------------------|--------------|-------------------------------------------------|
| Pfizer                                                             | Employment   | Self                                            |
| <i>Title:</i> Executive Director<br><i>Additional Information:</i> |              | <i>Position Description:</i> Vaccine Researcher |
| Pfizer                                                             | Stock        | Self                                            |
| <i>Additional Information:</i>                                     |              |                                                 |
| Pfizer                                                             | Stock Option | Self                                            |
| Additional Information:                                            |              |                                                 |

## Additional Questions

1. Are there other relationships or activities that readers could perceive to have influenced, or that give the appearance of potentially influencing, what you wrote in the submitted work?

No.

2. What is the manuscript title?

A Bivalent Omicron-BA.1-Adapted BNT162b2 COVID-19 Booster in >55-Year-Olds

3. Are you the corresponding author?

No.

## Certification

I certify that the information provided in this disclosure is complete and accurate.

Douglas Denham

**Discloser Identifier:** 1063624

**Disclosure Purpose:** 22-13082

## Summary of Interests

I do not have any interests to disclose at this time.

## Additional Questions

**1. Are there other relationships or activities that readers could perceive to have influenced, or that give the appearance of potentially influencing, what you wrote in the submitted work?**

No.

**2. What is the manuscript title?**

A Bivalent Omicron-BA.1-Adapted BNT162b2 COVID-19 Booster in >55-Year-Olds

**3. Are you the corresponding author?**

No.

## Certification

I certify that the information provided in this disclosure is complete and accurate.

**Discloser Identifier:** 1098361

**Disclosure Purpose:** 22-13082

## Summary of Interests

I do not have any interests to disclose at this time.

## Additional Questions

**1. Are there other relationships or activities that readers could perceive to have influenced, or that give the appearance of potentially influencing, what you wrote in the submitted work?**

No.

**2. What is the manuscript title?**

A Bivalent Omicron-BA.1-Adapted BNT162b2 COVID-19 Booster in >55-Year-Olds

**3. Are you the corresponding author?**

No.

## Certification

I certify that the information provided in this disclosure is complete and accurate.

Discloser Identifier: 1063625

Disclosure Purpose: 22-13082

## Summary of Interests

### Company or Organization

| Entity                                                                                                                                                           | Type             | Interest Held By                                                                |
|------------------------------------------------------------------------------------------------------------------------------------------------------------------|------------------|---------------------------------------------------------------------------------|
| AstraZeneca                                                                                                                                                      | Grant / Contract | Self                                                                            |
| <i>Recipient Name:</i> David Fitz-Patrick, M.D., Inc<br><i>Grant / Contract Description:</i> Grant support for clinical trials<br><i>Additional Information:</i> |                  | <i>Recipient Type:</i> Institution<br><i>Grant / Contract Purpose:</i> Research |
| Moderna                                                                                                                                                          | Grant / Contract | Self                                                                            |
| <i>Recipient Name:</i> David Fitz-Patrick, M.D., Inc<br><i>Grant / Contract Description:</i> Grant support for clinical trials<br><i>Additional Information:</i> |                  | <i>Recipient Type:</i> Institution<br><i>Grant / Contract Purpose:</i> Research |
| Pfizer Inc.                                                                                                                                                      | Grant / Contract | Self                                                                            |
| <i>Recipient Name:</i> David Fitz-Patrick, M.D., Inc<br><i>Grant / Contract Description:</i> Grant support for clinical trials<br><i>Additional Information:</i> |                  | <i>Recipient Type:</i> Institution<br><i>Grant / Contract Purpose:</i> Research |

## Additional Questions

1. Are there other relationships or activities that readers could perceive to have influenced, or that give the appearance of potentially influencing, what you wrote in the submitted work?

No.

2. What is the manuscript title?

Safety and Immunogenicity of Omicron-Modified BA.1 adapted BNT162b2 COVID-19 Vaccine in participants >55yrs of age

3. Are you the corresponding author?

No.

## Certification

I certify that the information provided in this disclosure is complete and accurate.





Juleen Gayed

Discloser Identifier: 1063596

Disclosure Purpose: 22-13082

## Summary of Interests

### Company or Organization

| Entity                                                                        | Type         | Interest Held By             |
|-------------------------------------------------------------------------------|--------------|------------------------------|
| Pfizer Limited                                                                | Employment   | Self                         |
| <i>Title:</i> Director Clinical Research MD<br><i>Additional Information:</i> |              | <i>Position Description:</i> |
| Pfizer Limited                                                                | Stock        | Self                         |
| <i>Additional Information:</i>                                                |              |                              |
| Pfizer Limited                                                                | Stock Option | Self                         |
| <i>Additional Information:</i>                                                |              |                              |

## Additional Questions

1. Are there other relationships or activities that readers could perceive to have influenced, or that give the appearance of potentially influencing, what you wrote in the submitted work?

No.

2. What is the manuscript title?

A Bivalent Omicron-BA.1-Adapted BNT162b2 COVID-19 Booster in >55-Year-Olds

3. Are you the corresponding author?

Yes.

a. Please list the other authors' names here.

Patricia Winokur, MD, David Fitz-Patrick, MD, Stephen J. Thomas, MD, Oyenyi Diya, MD, Stephen Lockhart, DM, Xia Xu, PhD, Ying Zhang, PhD, Vishva Bangad, MS, Howard I. Schwartz, MD, Douglas Denham, DO, Jose F. Cardona, MD, JD, MBA-HA, Lisa Usdan, MD, John Ginis, BS, Federico Mensa, MD, Jing Zou, PhD, Xuping Xie, PhD, Pei-Yong Shi, PhD, Claire Lu, PhD, Sandra Buitrago, MS, Ingrid L. Scully, PhD, David Cooper, PhD, Kenneth Koury, PhD, Kathrin U. Jansen, PhD, Özlem Türeci, MD, Uğur Şahin, MD, Kena A. Swanson, PhD, William C. Gruber, MD, Nicholas Kitchin, MD

## Certification

I certify that the information provided in this disclosure is complete and accurate.



John Ginis

Discloser Identifier: 737730

Disclosure Purpose: 22-13082

## Summary of Interests

### Company or Organization

| Entity                                                                              | Type       | Interest Held By             |
|-------------------------------------------------------------------------------------|------------|------------------------------|
| Pfizer                                                                              | Employment | Self                         |
| <i>Title:</i> Senior Director, Clinical Scientist<br><i>Additional Information:</i> |            | <i>Position Description:</i> |

## Additional Questions

1. Are there other relationships or activities that readers could perceive to have influenced, or that give the appearance of potentially influencing, what you wrote in the submitted work?

No.

2. What is the manuscript title?

A Bivalent Omicron-BA.1-Adapted BNT162b2 COVID-19 Booster in >55-Year-Olds

3. Are you the corresponding author?

No.

## Certification

I certify that the information provided in this disclosure is complete and accurate.

Discloser Identifier: 627453

Disclosure Purpose: 22-13082

## Summary of Interests

### Company or Organization

| Entity                                                                | Type         | Interest Held By                                                                                                     |
|-----------------------------------------------------------------------|--------------|----------------------------------------------------------------------------------------------------------------------|
| Pfizer                                                                | Employment   | Self                                                                                                                 |
| <i>Title:</i> Senior Vice President<br><i>Additional Information:</i> |              | <i>Position Description:</i> Vaccine Clinical Research and Development Worldwide<br>Research Development and Medical |
| Pfizer                                                                | Stock        | Self                                                                                                                 |
| <i>Additional Information:</i>                                        |              |                                                                                                                      |
| Pfizer                                                                | Stock Option | Self                                                                                                                 |
| <i>Additional Information:</i>                                        |              |                                                                                                                      |

## Additional Questions

1. Are there other relationships or activities that readers could perceive to have influenced, or that give the appearance of potentially influencing, what you wrote in the submitted work?

No.

2. What is the manuscript title?

A Bivalent Omicron-BA.1-Adapted BNT162b2 COVID-19 Booster in >55-Year-Olds

3. Are you the corresponding author?

No.

## Certification

I certify that the information provided in this disclosure is complete and accurate.

kathrin Jansen

Discloser Identifier: 627443

Disclosure Purpose: 22-13082

## Summary of Interests

### Company or Organization

| Entity                                                                                                                            | Type       | Interest Held By |
|-----------------------------------------------------------------------------------------------------------------------------------|------------|------------------|
| Pfizer Inc.                                                                                                                       | Consultant | Self             |
| <i>Category:</i> Consultant<br><i>Description:</i> vaccine consultant<br><i>Additional Information:</i> less than 10 hours a week |            |                  |
| Pfizer Inc.                                                                                                                       | Stock      | Self             |
| <i>Additional Information:</i> shareholder                                                                                        |            |                  |

## Additional Questions

1. Are there other relationships or activities that readers could perceive to have influenced, or that give the appearance of potentially influencing, what you wrote in the submitted work?

No.

2. What is the manuscript title?

A Bivalent Omicron-BA.1-Adapted BNT162b2 COVID-19 Booster in >55-Year-Olds

3. Are you the corresponding author?

No.

## Certification

I certify that the information provided in this disclosure is complete and accurate.

**Discloser Identifier:** 970660

**Disclosure Purpose:** 22-13082

## Summary of Interests

### Company or Organization

| Entity                                                                            | Type         | Interest Held By                                                       |
|-----------------------------------------------------------------------------------|--------------|------------------------------------------------------------------------|
| Pfizer                                                                            | Employment   | Self                                                                   |
| <i>Title:</i> Vice President<br><i>Additional Information:</i> Full time employee |              | <i>Position Description:</i> Vaccine Clinical Research and Development |
| Pfizer                                                                            | Stock        | Self                                                                   |
| <i>Additional Information:</i>                                                    |              |                                                                        |
| Pfizer                                                                            | Stock Option | Self                                                                   |
| Additional Information:                                                           |              |                                                                        |

## Additional Questions

**1. Are there other relationships or activities that readers could perceive to have influenced, or that give the appearance of potentially influencing, what you wrote in the submitted work?**

No.

**2. What is the manuscript title?**

A Bivalent Omicron-BA.1-Adapted BNT162b2 COVID-19 Booster in >55-Year-Olds

**3. Are you the corresponding author?**

No.

## Certification

I certify that the information provided in this disclosure is complete and accurate.

Kenneth Koury

Discloser Identifier: 970666

Disclosure Purpose: 22-13082

## Summary of Interests

### Company or Organization

| Entity                                                             | Type       | Interest Held By                                                                                        |
|--------------------------------------------------------------------|------------|---------------------------------------------------------------------------------------------------------|
| Pfizer                                                             | Employment | Self                                                                                                    |
| <i>Title:</i> Executive Director<br><i>Additional Information:</i> |            | <i>Position Description:</i> Head of Statistics and Modeling, Vaccine Clinical Research and Development |
| Pfizer                                                             | Stock      | Self                                                                                                    |
| <i>Additional Information:</i>                                     |            |                                                                                                         |

## Additional Questions

1. Are there other relationships or activities that readers could perceive to have influenced, or that give the appearance of potentially influencing, what you wrote in the submitted work?

No.

2. What is the manuscript title?

A Bivalent Omicron-BA.1-Adapted BNT162b2 COVID-19 Booster in >55-Year-Olds

3. Are you the corresponding author?

No.

## Certification

I certify that the information provided in this disclosure is complete and accurate.

Discloser Identifier: 970661

Disclosure Purpose: 22-13082

## Summary of Interests

### Company or Organization

| Entity                                                         | Type         | Interest Held By                                                                     |
|----------------------------------------------------------------|--------------|--------------------------------------------------------------------------------------|
| Pfizer                                                         | Employment   | Self                                                                                 |
| <i>Title:</i> Vice President<br><i>Additional Information:</i> |              | <i>Position Description:</i> Clinical Research Head Vaccines Europe and Asia Pacific |
| Pfizer                                                         | Stock        | Self                                                                                 |
| <i>Additional Information:</i>                                 |              |                                                                                      |
| Pfizer                                                         | Stock Option | Self                                                                                 |
| Additional Information:                                        |              |                                                                                      |

## Additional Questions

1. Are there other relationships or activities that readers could perceive to have influenced, or that give the appearance of potentially influencing, what you wrote in the submitted work?

No.

2. What is the manuscript title?

A Bivalent Omicron-BA.1-Adapted BNT162b2 COVID-19 Booster in >55-Year-Olds

3. Are you the corresponding author?

No.

## Certification

I certify that the information provided in this disclosure is complete and accurate.



Claire Lu

Discloser Identifier: 1063600

Disclosure Purpose: 22-13082

## Summary of Interests

### Company or Organization

| Entity                                                   | Type       | Interest Held By             |
|----------------------------------------------------------|------------|------------------------------|
| Pfizer                                                   | Employment | Self                         |
| <i>Title:</i> Director<br><i>Additional Information:</i> |            | <i>Position Description:</i> |
| Pfizer                                                   | Stock      | Self                         |
| <i>Additional Information:</i>                           |            |                              |

## Additional Questions

1. Are there other relationships or activities that readers could perceive to have influenced, or that give the appearance of potentially influencing, what you wrote in the submitted work?

No.

2. What is the manuscript title?

A Bivalent Omicron-BA.1-Adapted BNT162b2 COVID-19 Booster in >55-Year-Olds

3. Are you the corresponding author?

No.

## Certification

I certify that the information provided in this disclosure is complete and accurate.

Discloser Identifier: 1098366

Disclosure Purpose: 22-13082

## Summary of Interests

### Company or Organization

| Entity                                                                                                                                  | Type       | Interest Held By                                                                                                            |
|-----------------------------------------------------------------------------------------------------------------------------------------|------------|-----------------------------------------------------------------------------------------------------------------------------|
| BioNTech                                                                                                                                | Employment | Self                                                                                                                        |
| <i>Title:</i> Vice President Clinical Development Infectious Diseases<br><i>Additional Information:</i>                                 |            | <i>Position Description:</i> Responsible for the clinical development of vaccines and therapeutics for Infectious Diseases. |
| BioNTech                                                                                                                                | Stock      | Self                                                                                                                        |
| <i>Additional Information:</i> I have restricted stock units (RSUs) and I may have stocks at the time of the publication of the article |            |                                                                                                                             |

## Additional Questions

1. Are there other relationships or activities that readers could perceive to have influenced, or that give the appearance of potentially influencing, what you wrote in the submitted work?

No.

2. What is the manuscript title?

A Bivalent Omicron-BA.1-Adapted BNT162b2 COVID-19 Booster in >55-Year-Olds

3. Are you the corresponding author?

No.

## Certification

I certify that the information provided in this disclosure is complete and accurate.

Discloser Identifier: 970674

Disclosure Purpose: 22-13082

## Summary of Interests

### Company or Organization

| Entity                                                                                       | Type              | Interest Held By                                 |
|----------------------------------------------------------------------------------------------|-------------------|--------------------------------------------------|
| biontech                                                                                     | Fiduciary Officer | Self                                             |
| <i>Official Title:</i> Chief Executive Officer, Co-Founder<br><i>Additional Information:</i> |                   | <i>Position Description:</i> Member of the Board |
| biontech                                                                                     | Stock             | Self                                             |
| <i>Additional Information:</i>                                                               |                   |                                                  |
| biontech                                                                                     | Stock Option      | Self                                             |
| Additional Information:                                                                      |                   |                                                  |

### Intellectual Property

| Type                                                                                                                                                                                                                                                              | Is Licensed | Interest Held By                                                                                        |
|-------------------------------------------------------------------------------------------------------------------------------------------------------------------------------------------------------------------------------------------------------------------|-------------|---------------------------------------------------------------------------------------------------------|
| Patent - 3 UTR Sequences for stabilisation of mRNA                                                                                                                                                                                                                | -           | Self                                                                                                    |
| <i>Description:</i> 3 UTR Sequences for stabilisation of mRNA<br><i>Patent Status:</i> Pending<br><i>Filing Jurisdiction:</i> USA<br><i>Licensees:</i>                                                                                                            |             | <i>Patent Number:</i> EPPCT/EP2015/073180, US 20190071682<br><i>Patent Holder:</i> Previous Institution |
| Licensee                                                                                                                                                                                                                                                          | Title       | Date                                                                                                    |
| biontech                                                                                                                                                                                                                                                          |             |                                                                                                         |
| <i>Additional Information:</i> I am co-inventors on various patents on RNA Technologies, both pending and granted, which have been filed over a period of 10+ years, some of which are licensed to third parties. Jurisdictions are Broad including US, EU, Asia. |             |                                                                                                         |

### Additional Questions

1. Are there other relationships or activities that readers could perceive to have influenced, or that give the appearance of potentially influencing, what you wrote in the submitted work?

No.

2. What is the manuscript title?

A Bivalent Omicron-BA.1-Adapted BNT162b2 COVID-19 Booster in >55-Year-Olds

3. Are you the corresponding author?

No.

## Certification

I certify that the information provided in this disclosure is complete and accurate.

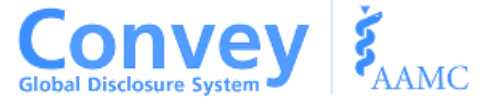

Howard schwartz

**Discloser Identifier:** 1098364

**Disclosure Purpose:** 22-13082

## Summary of Interests

I do not have any interests to disclose at this time.

## Additional Questions

**1. Are there other relationships or activities that readers could perceive to have influenced, or that give the appearance of potentially influencing, what you wrote in the submitted work?**

No.

**2. What is the manuscript title?**

A Bivalent Omicron-BA.1-Adapted BNT162b2 COVID-19 Booster in >55-Year-Olds

**3. Are you the corresponding author?**

No.

## Certification

I certify that the information provided in this disclosure is complete and accurate.

Discloser Identifier: 1098368

Disclosure Purpose: 22-13082

## Summary of Interests

### Company or Organization

| Entity                                                                                            | Type       | Interest Held By                                                         |
|---------------------------------------------------------------------------------------------------|------------|--------------------------------------------------------------------------|
| Pfizer Inc.                                                                                       | Employment | Self                                                                     |
| <i>Title:</i> Executive Director Vaccine Research & Development<br><i>Additional Information:</i> |            | <i>Position Description:</i> vaccine immunologist supporting vaccine R&D |
| Pfizer Inc.                                                                                       | Stock      | Self                                                                     |
| <i>Additional Information:</i> employee stock incentives                                          |            |                                                                          |

## Additional Questions

1. Are there other relationships or activities that readers could perceive to have influenced, or that give the appearance of potentially influencing, what you wrote in the submitted work?

No.

2. What is the manuscript title?

A Bivalent Omicron-BA.1-Adapted BNT162b2 COVID-19 Booster in >55-Year-Olds

3. Are you the corresponding author?

No.

## Certification

I certify that the information provided in this disclosure is complete and accurate.

Pei-Yong Shi

Discloser Identifier: 717400

Disclosure Purpose: 22-13082

## Summary of Interests

### Company or Organization

| Entity                                                                                                                                | Type             | Interest Held By                                                                |
|---------------------------------------------------------------------------------------------------------------------------------------|------------------|---------------------------------------------------------------------------------|
| Pfizer Inc.                                                                                                                           | Grant / Contract | Self                                                                            |
| <i>Recipient Name:</i> Pei-Yong Shi<br><i>Grant / Contract Description:</i> Contract<br><i>Additional Information:</i> Sample testing |                  | <i>Recipient Type:</i> Institution<br><i>Grant / Contract Purpose:</i> Research |

## Additional Questions

1. Are there other relationships or activities that readers could perceive to have influenced, or that give the appearance of potentially influencing, what you wrote in the submitted work?

No.

2. What is the manuscript title?

A Bivalent Omicron-BA.1-Adapted BNT162b2 COVID-19 Booster in >55-Year-Olds

3. Are you the corresponding author?

No.

## Certification

I certify that the information provided in this disclosure is complete and accurate.

Kena Swanson

Discloser Identifier: 970664

Disclosure Purpose: 22-13082

## Summary of Interests

### Company or Organization

| Entity                                                                         | Type       | Interest Held By                                              |
|--------------------------------------------------------------------------------|------------|---------------------------------------------------------------|
| Pfizer                                                                         | Employment | Self                                                          |
| <i>Title:</i> Vice President, Viral Vaccines<br><i>Additional Information:</i> |            | <i>Position Description:</i> vaccine research and development |
| Pfizer                                                                         | Stock      | Self                                                          |
| <i>Additional Information:</i>                                                 |            |                                                               |

## Additional Questions

1. Are there other relationships or activities that readers could perceive to have influenced, or that give the appearance of potentially influencing, what you wrote in the submitted work?

No.

2. What is the manuscript title?

A Bivalent Omicron-BA.1-Adapted BNT162b2 COVID-19 Booster in >55-Year-Olds

3. Are you the corresponding author?

No.

## Certification

I certify that the information provided in this disclosure is complete and accurate.



Discloser Identifier: 776591

Disclosure Purpose: 22-13082

## Summary of Interests

### Company or Organization

| Entity                                                                                                                                                                                                                                        | Type                       | Interest Held By |
|-----------------------------------------------------------------------------------------------------------------------------------------------------------------------------------------------------------------------------------------------|----------------------------|------------------|
| <a href="#">Clover Biopharmaceuticals</a>                                                                                                                                                                                                     | End Point Review Committee | Self             |
| <p><i>Category:</i> End Point Review Committee<br/> <i>Description:</i> case adjudication committee<br/> <i>Additional Information:</i> adjudicate covid cases reported during conduct of covid vaccine trial</p>                             |                            |                  |
| <a href="#">EdJen Biotech</a>                                                                                                                                                                                                                 | Consultant                 | Self             |
| <p><i>Category:</i> Consultant<br/> <i>Description:</i> scientific ad board<br/> <i>Additional Information:</i> single meeting</p>                                                                                                            |                            |                  |
| <a href="#">Icosavax</a>                                                                                                                                                                                                                      | Data And Safety Monitoring | Self             |
| <p><i>Category:</i> Data And Safety Monitoring<br/> <i>Description:</i> covid vaccine DSMB<br/> <i>Additional Information:</i> DSMB for covid vaccine trial</p>                                                                               |                            |                  |
| <a href="#">New Day Diagnostics</a>                                                                                                                                                                                                           | Consultant                 | Self             |
| <p><i>Category:</i> Consultant<br/> <i>Description:</i><br/> <i>Additional Information:</i> one time speaker engagement on covid</p>                                                                                                          |                            |                  |
| <a href="#">Pfizer</a>                                                                                                                                                                                                                        | Consultant                 | Self             |
| <p><i>Category:</i> Consultant<br/> <i>Description:</i> mRNA vaccine ad board, vaccine roll out KOL, scientific communications KOL, conference speaker<br/> <i>Additional Information:</i> various compensation for time, travel expenses</p> |                            |                  |
| <a href="#">Rheonix</a>                                                                                                                                                                                                                       | Consultant                 | Self             |
| <p><i>Category:</i> Consultant<br/> <i>Description:</i> Scientific advisory board member and chief medical officer<br/> <i>Additional Information:</i> COVID diagnostics developer, SAB member and Chief Medical Officer</p>                  |                            |                  |
| <a href="#">Vaxxinity</a>                                                                                                                                                                                                                     | Consultant                 | Self             |
| <p><i>Category:</i> Consultant<br/> <i>Description:</i> DSMB member<br/> <i>Additional Information:</i> DSMB member reviewing safety data from trials, 2 meetings</p>                                                                         |                            |                  |

## Additional Questions

**1. Are there other relationships or activities that readers could perceive to have influenced, or that give the appearance of potentially influencing, what you wrote in the submitted work?**

Yes.

**a. Please describe those relationships.**

I have disclosed any and all relationships related to COVID. I have not disclosed all relationships related to vaccines in general or mRNA technology platforms.

**2. What is the manuscript title?**

A Bivalent Omicron-BA.1-Adapted BNT162b2 COVID-19 Booster in >55-Year-Olds

**3. Are you the corresponding author?**

No.

## Certification

I certify that the information provided in this disclosure is complete and accurate.

Discloser Identifier: 970670

Disclosure Purpose: 22-13082

## Summary of Interests

### Company or Organization

| Entity                                                                                                                                                          | Type              | Interest Held By                                      |
|-----------------------------------------------------------------------------------------------------------------------------------------------------------------|-------------------|-------------------------------------------------------|
| biontech                                                                                                                                                        | Employment        | Self                                                  |
| <i>Title:</i> Chief Medical Officer<br><i>Additional Information:</i> also spouse is board member and CEO of Company since 2008                                 |                   | <i>Position Description:</i> Board member, CO-founder |
| biontech                                                                                                                                                        | Fiduciary Officer | Self                                                  |
| <i>Official Title:</i> Chief Medical Officer<br><i>Additional Information:</i> also spouse is co-founder and board member (Chief Executive Officer) of Biontech |                   | <i>Position Description:</i> board member, co-founder |
| biontech                                                                                                                                                        | Stock Option      | Self                                                  |
| Additional Information: self and spouse have stock Options. spouse has stock                                                                                    |                   |                                                       |

### Intellectual Property

| Type                                                                                                                                                                                                     | Is Licensed | Interest Held By                                                                                 |
|----------------------------------------------------------------------------------------------------------------------------------------------------------------------------------------------------------|-------------|--------------------------------------------------------------------------------------------------|
| Patent - Modifications of RNA leading to increased transcr                                                                                                                                               | -           | Self                                                                                             |
| <i>Description:</i> Modifications of RNA leading to increased transcript stability and translational efficiency<br><i>Patent Status:</i> Pending<br><i>Filing Jurisdiction:</i> USA<br><i>Licensees:</i> |             | <i>Patent Number:</i> EP1934345B9, DE102005046490.4<br><i>Patent Holder:</i> Current Institution |
| Licensee                                                                                                                                                                                                 | Title       | Date                                                                                             |
| biontech                                                                                                                                                                                                 |             |                                                                                                  |
| <i>Additional Information:</i> self and spouse are co-inventors on various patents on RNA Tech                                                                                                           |             |                                                                                                  |

### Additional Questions

1. Are there other relationships or activities that readers could perceive to have influenced, or that give the appearance of potentially influencing, what you wrote in the submitted work?

No.

2. What is the manuscript title?

A Bivalent Omicron-BA.1-Adapted BNT162b2 COVID-19 Booster in >55-Year-Olds

3. Are you the corresponding author?

No.

## Certification

I certify that the information provided in this disclosure is complete and accurate.

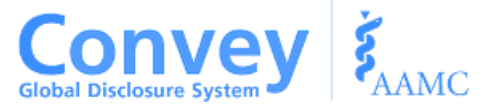

**Discloser Identifier:** 1098365

**Disclosure Purpose:** 22-13082

## Summary of Interests

I do not have any interests to disclose at this time.

## Additional Questions

**1. Are there other relationships or activities that readers could perceive to have influenced, or that give the appearance of potentially influencing, what you wrote in the submitted work?**

No.

**2. What is the manuscript title?**

A Bivalent Omicron-BA.1-Adapted BNT162b2 COVID-19 Booster in >55-Year-Olds

**3. Are you the corresponding author?**

No.

## Certification

I certify that the information provided in this disclosure is complete and accurate.

Patricia Winokur

Discloser Identifier: 335414

Disclosure Purpose: 22-13082

## Summary of Interests

### Company or Organization

| Entity                                                                                                                                                   | Type       | Interest Held By |
|----------------------------------------------------------------------------------------------------------------------------------------------------------|------------|------------------|
| PFIZER CANADA INC                                                                                                                                        | Consultant | Self             |
| <i>Category:</i> Consultant<br><i>Description:</i> Served on Pfizer advisory board<br><i>Additional Information:</i> Approximately 5 hours of commitment |            |                  |

## Additional Questions

1. Are there other relationships or activities that readers could perceive to have influenced, or that give the appearance of potentially influencing, what you wrote in the submitted work?

No.

2. What is the manuscript title?

Safety and Immunogenicity of Omicron BA.1 adapted BNT162b2 COVID 19 Vaccine in participants greater than 55 years of age.

3. Are you the corresponding author?

No.

## Certification

I certify that the information provided in this disclosure is complete and accurate.

Discloser Identifier: 996937

Disclosure Purpose: 22-13082

## Summary of Interests

### Company or Organization

| Entity                                                                                                                                                              | Type             | Interest Held By                                                                |
|---------------------------------------------------------------------------------------------------------------------------------------------------------------------|------------------|---------------------------------------------------------------------------------|
| Pfizer Inc.                                                                                                                                                         | Grant / Contract | Self                                                                            |
| <i>Recipient Name:</i> Xuping Xie<br><i>Grant / Contract Description:</i> Pfizer's contract supports the testing of the specimens<br><i>Additional Information:</i> |                  | <i>Recipient Type:</i> Institution<br><i>Grant / Contract Purpose:</i> Research |

## Additional Questions

1. Are there other relationships or activities that readers could perceive to have influenced, or that give the appearance of potentially influencing, what you wrote in the submitted work?

No.

2. What is the manuscript title?

A Bivalent Omicron-BA.1-Adapted BNT162b2 COVID-19 Booster in >55-Year-Olds

3. Are you the corresponding author?

No.

## Certification

I certify that the information provided in this disclosure is complete and accurate.

Discloser Identifier: 1017534

Disclosure Purpose: 22-13082

## Summary of Interests

### Company or Organization

| Entity                                                                           | Type       | Interest Held By                                                                      |
|----------------------------------------------------------------------------------|------------|---------------------------------------------------------------------------------------|
| Pfizer                                                                           | Employment | Self                                                                                  |
| <i>Title:</i> Sr. Director, Vaccine Statistics<br><i>Additional Information:</i> |            | <i>Position Description:</i> Design, conduct, and analysis of vaccine clinical trials |

## Additional Questions

1. Are there other relationships or activities that readers could perceive to have influenced, or that give the appearance of potentially influencing, what you wrote in the submitted work?

No.

2. What is the manuscript title?

A Bivalent Omicron-BA.1-Adapted BNT162b2 COVID-19 Booster in >55-Year-Olds

3. Are you the corresponding author?

No.

## Certification

I certify that the information provided in this disclosure is complete and accurate.



Discloser Identifier: 1098362

Disclosure Purpose: 22-13082

## Summary of Interests

### Company or Organization

| Entity                                                   | Type       | Interest Held By                           |
|----------------------------------------------------------|------------|--------------------------------------------|
| Pfizer Inc.                                              | Employment | Self                                       |
| <i>Title:</i> Director<br><i>Additional Information:</i> |            | <i>Position Description:</i> Biostatistics |

## Additional Questions

1. **Are there other relationships or activities that readers could perceive to have influenced, or that give the appearance of potentially influencing, what you wrote in the submitted work?**

No.

2. **What is the manuscript title?**

A Bivalent Omicron-BA.1-Adapted BNT162b2 COVID-19 Booster in >55-Year-Olds

3. **Are you the corresponding author?**

No

## Certification

I certify that the information provided in this disclosure is complete and accurate.

Discloser Identifier: 996939

Disclosure Purpose: 22-13082

## Summary of Interests

### Company or Organization

| Entity                                                                                                                                                            | Type             | Interest Held By                                                                |
|-------------------------------------------------------------------------------------------------------------------------------------------------------------------|------------------|---------------------------------------------------------------------------------|
| Pfizer Inc.                                                                                                                                                       | Grant / Contract | Self                                                                            |
| <i>Recipient Name:</i> Jing Zou<br><i>Grant / Contract Description:</i> Pfizer's contract supports the testing of the specimens<br><i>Additional Information:</i> |                  | <i>Recipient Type:</i> Institution<br><i>Grant / Contract Purpose:</i> Research |

## Additional Questions

1. Are there other relationships or activities that readers could perceive to have influenced, or that give the appearance of potentially influencing, what you wrote in the submitted work?

No.

2. What is the manuscript title?

A Bivalent Omicron-BA.1-Adapted BNT162b2 COVID-19 Booster in >55-Year-Olds

3. Are you the corresponding author?

No.

## Certification

I certify that the information provided in this disclosure is complete and accurate.
